# Supplementary material for: Circulating Total Extracellular Vesicles Cargo Are Associated with Age-Related Oxidative Stress and Susceptibility to Cardiovascular Diseases: Exploratory Results from Microarray Data
Source: MDPI journal article supplement (doi:10.3390/biomedicines11112920), 2023-10-28
Supplement: s1 [file s1]

**Supplementary Table S4.**

| <b>Ingenuity Canonical Pathways</b>                                   | <b>p-value</b> | <b>-log(p-value)</b> | <b>Ratio</b> | <b>z-score</b> | <b>miRNAs targetting pathway</b> | <b>Molecules</b> |
|-----------------------------------------------------------------------|----------------|----------------------|--------------|----------------|----------------------------------|------------------|
| Production of Nitric Oxide and Reactive Oxygen Species in Macrophages | 1.2E-06        | 5.92                 | 0.318        | 0.412          | 19                               | 56               |
| Nitric Oxide Signaling in the Cardiovascular System                   | 0.004          | 2.4                  | 0.274        | 1.043          | 15                               | 31               |
| nNOS Signaling in Neurons                                             | 0.0151         | 1.82                 | 0.311        | -0.378         | 9                                | 14               |
| Antioxidant Action of Vitamin C                                       | 0.0204         | 1.69                 | 0.255        | -0.218         | 13                               | 26               |
| NRF2-mediated Oxidative Stress Response                               | 0.0323         | 1.49                 | 0.221        | 0.898          | 19                               | 49               |
| eNOS Signaling                                                        | 0.0371         | 1.43                 | 0.231        | 1.3            | 16                               | 34               |

Canonical pathways are ranked according to  $-\log(\text{p-value})$ , calculated by Fisher's exact test right-tailed.
