# Supplementary material for: Circulating Total Extracellular Vesicles Cargo Are Associated with Age-Related Oxidative Stress and Susceptibility to Cardiovascular Diseases: Exploratory Results from Microarray Data
Source: MDPI journal article supplement (doi:10.3390/biomedicines11112920), 2023-10-28
Supplement: s1 [file s1]

Supplementary Figure S1.

A.

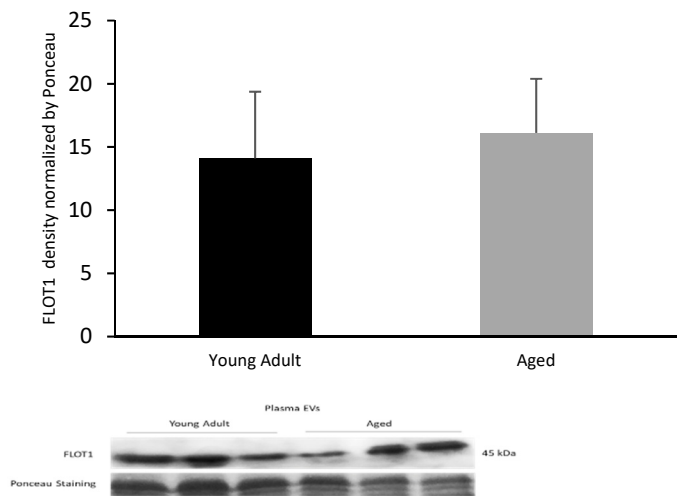

B.

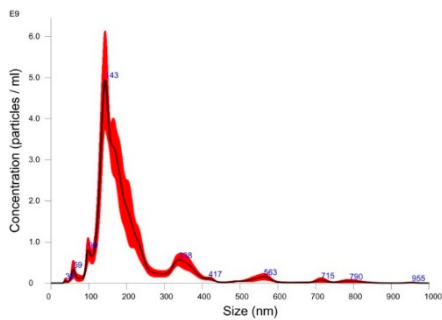

C.

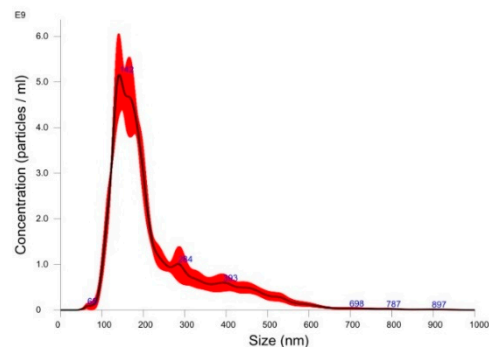

D.

| NTA characterization of extracellular vesicles |                    |                                                   |
|------------------------------------------------|--------------------|---------------------------------------------------|
|                                                | Mean Diameter (nm) | Concentration (particles/mL)                      |
| Young Adult                                    | 223.11 ± 28.62     | 1.07 × 10 <sup>12</sup> ± 5.07 × 10 <sup>11</sup> |
| Aged                                           | 218.5 ± 23.37      | 1.36 × 10 <sup>12</sup> ± 8.50 × 10 <sup>11</sup> |

NTA data on EVs size distribution and concentration from Wistar rats, of 3- and 21-month-old. Student's t-test;  $p < 0.05$  ( $n = 9$ /group).

**Supplementary Figure S1. (A)** Effect of aging process on **FLOT1 content** in circulating extracellular vesicles from *Wistar* rats of 3- and 21-month-olds. The columns represent the mean ± SD. Representative images from

the gel of Western Blot experiments, showing 3 bands for each experimental group. Student's t-test;  $p < 0.05$  (n=6). Representative data of **NTA analysis** showing size distribution profile and concentration of circulating EVs from **(B)** young-adult (3-month-old) and **(C)** aged (21-month-old) *Wistar* rats (n=9) **(D)**. NTA data on EVP size distribution and concentration from *Wistar* rats of 3- and 21-month-olds. Student's t-test;  $p < 0.05$  (n=9/group).
