# Supplementary material for: Circulating Total Extracellular Vesicles Cargo Are Associated with Age-Related Oxidative Stress and Susceptibility to Cardiovascular Diseases: Exploratory Results from Microarray Data
Source: MDPI journal article supplement (doi:10.3390/biomedicines11112920), 2023-10-28
Supplement: s1 [file s1]

**Supplementary Table S5.** Production of Nitric Oxide and Reactive Oxygen Species Macrophages Canonical Pathway

| miRNA         | Symbol  | Gene Name                                                           | P-value | Molecule Predicted Fold Change | Location            |
|---------------|---------|---------------------------------------------------------------------|---------|--------------------------------|---------------------|
| miR-128-1-5p  | AKT2    | AKT serinethreonine kinase 2                                        | 0.0468  | -1.906                         | Cytoplasm           |
| miR-22-3p     | AKT3    | AKT serinethreonine kinase 3                                        | 0.0351  | 1.272                          | Cytoplasm           |
| miR-128-1-5p  | APOC2   | apolipoprotein C2                                                   | 0.0468  | -1.906                         | Extracellular Space |
| miR-3064-5p   | APOC4   | apolipoprotein C4                                                   | 0.0478  | -1.148                         | Extracellular Space |
| let-7a-5p     | ARG2    | arginase 2                                                          | 0.0378  | 1.16                           | Cytoplasm           |
| miR-190a-5p   | CAT     | catalase                                                            | 0.0107  | 1.335                          | Cytoplasm           |
| miR-128-1-5p  | CLU     | clusterin                                                           | 0.0468  | -1.906                         | Cytoplasm           |
| miR-128-1-5p  | IKBKB   | inhibitor of nuclear factor kappa B kinase subunit beta             | 0.0468  | -1.906                         | Cytoplasm           |
| miR-34a-5p    | IKBKE   | inhibitor of nuclear factor kappa B kinase subunit epsilon          | 0.00859 | 1.276                          | Cytoplasm           |
| miR-128-1-5p  | IKBKG   | inhibitor of nuclear factor kappa B kinase regulatory subunit gamma | 0.0468  | -1.906                         | Nucleus             |
| miR-17-5p     | JAK1    | Janus kinase 1                                                      | 0.0462  | -1.249                         | Cytoplasm           |
| miR-34a-5p    | MAP2K1  | mitogen-activated protein kinase kinase 1                           | 0.00859 | 1.276                          | Cytoplasm           |
| miR-92a-3p    | MAP2K4  | mitogen-activated protein kinase kinase 4                           | 0.00168 | 1.416                          | Cytoplasm           |
| miR-142-3p    | MAP3K11 | mitogen-activated protein kinase kinase kinase 11                   | 0.00331 | 1.233                          | Cytoplasm           |
| miR-17-5p     | MAP3K12 | mitogen-activated protein kinase kinase kinase 12                   | 0.0462  | -1.249                         | Cytoplasm           |
| let-7a-5p     | MAP3K13 | mitogen-activated protein kinase kinase kinase 13                   | 0.0378  | 1.16                           | Cytoplasm           |
| miR-17-5p     | MAP3K2  | mitogen-activated protein kinase kinase kinase 2                    | 0.0462  | -1.249                         | Cytoplasm           |
| miR-199a-3p   | MAP3K4  | mitogen-activated protein kinase kinase kinase 4                    | 0.0423  | -1.233                         | Cytoplasm           |
| miR-181a-1-3p | MAP3K5  | mitogen-activated protein kinase kinase kinase 5                    | 0.00689 | 1.241                          | Cytoplasm           |
| miR-214-3p    | MAP3K9  | mitogen-activated protein kinase kinase kinase 9                    | 0.0334  | -1.265                         | Cytoplasm           |
| miR-143-3p    | MAPK12  | mitogen-activated protein kinase 12                                 | 0.0194  | -1.212                         | Cytoplasm           |
| miR-30c-1-3p  | MAPK13  | mitogen-activated protein kinase 13                                 | 0.0424  | 1.298                          | Cytoplasm           |
| miR-22-3p     | MAPK14  | mitogen-activated protein kinase 14                                 | 0.0351  | 1.272                          | Cytoplasm           |

|              |          |                                                                        |         |        |                 |
|--------------|----------|------------------------------------------------------------------------|---------|--------|-----------------|
| miR-3120     | MAPK8    | mitogen-activated protein kinase 8                                     | 0.0486  | 1.286  | Cytoplasm       |
| miR-128-1-5p | NGFR     | nerve growth factor receptor                                           | 0.0468  | -1.906 | Plasma Membrane |
| miR-199a-3p  | PIK3CB   | phosphatidylinositol-4,5-bisphosphate 3-kinase catalytic subunit beta  | 0.0423  | -1.233 | Cytoplasm       |
| miR-31-3p    | PIK3CG   | phosphatidylinositol-4,5-bisphosphate 3-kinase catalytic subunit gamma | 0.0436  | 1.339  | Cytoplasm       |
| miR-128-1-5p | PIK3R2   | phosphoinositide-3-kinase regulatory subunit 2                         | 0.0468  | -1.906 | Cytoplasm       |
| miR-92a-3p   | PIK3R3   | phosphoinositide-3-kinase regulatory subunit 3                         | 0.00168 | 1.416  | Cytoplasm       |
| miR-30c-1-3p | PIK3R6   | phosphoinositide-3-kinase regulatory subunit 6                         | 0.0424  | 1.298  | Cytoplasm       |
| miR-22-3p    | PPARA    | peroxisome proliferator activated receptor alpha                       | 0.0351  | 1.272  | Nucleus         |
| miR-34a-5p   | PPP1R14D | protein phosphatase 1 regulatory inhibitor subunit 14D                 | 0.00859 | 1.276  | Cytoplasm       |
| miR-214-3p   | PPP1R3D  | protein phosphatase 1 regulatory subunit 3D                            | 0.0334  | -1.265 | Cytoplasm       |
| let-7a-5p    | PPP1R7   | protein phosphatase 1 regulatory subunit 7                             | 0.0378  | 1.16   | Nucleus         |
| miR-3585-5p  | PPP2CA   | protein phosphatase 2 catalytic subunit alpha                          | 0.00394 | 1.251  | Cytoplasm       |
| miR-142-3p   | PPP2R1A  | protein phosphatase 2 scaffold subunit Aalpha                          | 0.00331 | 1.233  | Cytoplasm       |
| miR-199a-3p  | PPP2R2A  | protein phosphatase 2 regulatory subunit Balpha                        | 0.0423  | -1.233 | Cytoplasm       |
| miR-150-3p   | PPP2R3A  | protein phosphatase 2 regulatory subunit B''alpha                      | 0.0297  | -1.401 | Nucleus         |
| miR-199a-3p  | PPP2R5E  | protein phosphatase 2 regulatory subunit B'epsilon                     | 0.0423  | -1.233 | Cytoplasm       |
| miR-142-3p   | PRKCA    | protein kinase C alpha                                                 | 0.00331 | 1.233  | Cytoplasm       |
| miR-22-3p    | PRKCB    | protein kinase C beta                                                  | 0.0351  | 1.272  | Cytoplasm       |
| miR-30c-1-3p | PRKCG    | protein kinase C gamma                                                 | 0.0424  | 1.298  | Cytoplasm       |
| miR-128-1-5p | PRKCQ    | protein kinase C theta                                                 | 0.0468  | -1.906 | Cytoplasm       |
| miR-142-3p   | RAC1     | Rac family small GTPase 1                                              | 0.00331 | 1.233  | Plasma Membrane |
| miR-92a-3p   | RAP1B    | RAP1B, member of RAS oncogene family                                   | 0.00168 | 1.416  | Cytoplasm       |
| miR-3585-5p  | RHOA     | ras homolog family member A                                            | 0.00394 | 1.251  | Cytoplasm       |
| let-7a-5p    | RHOB     | ras homolog family member B                                            | 0.0378  | 1.16   | Cytoplasm       |
| miR-410-5p   | RHOBTB2  | Rho related BTB domain containing 2                                    | 0.033   | -1.154 | Cytoplasm       |
| miR-17-5p    | RHOC     | ras homolog family member C                                            | 0.0462  | -1.249 | Plasma Membrane |
| let-7a-5p    | RHOG     | ras homolog family member G                                            | 0.0378  | 1.16   | Cytoplasm       |

|              |        |                                 |        |        |                     |
|--------------|--------|---------------------------------|--------|--------|---------------------|
| miR-30c-1-3p | RHOJ   | ras homolog family member J     | 0.0424 | 1.298  | Cytoplasm           |
| miR-22-3p    | RHOV   | ras homolog family member V     | 0.0351 | 1.272  | Plasma Membrane     |
| let-7a-5p    | S100A8 | S100 calcium binding protein A8 | 0.0378 | 1.16   | Cytoplasm           |
| miR-128-1-5p | SIRPA  | signal regulatory protein alpha | 0.0468 | -1.906 | Plasma Membrane     |
| let-7a-5p    | TLR4   | toll like receptor 4            | 0.0378 | 1.16   | Plasma Membrane     |
| miR-17-5p    | TNF    | tumor necrosis factor           | 0.0462 | -1.249 | Extracellular Space |
