# Supplementary material for: Circulating Total Extracellular Vesicles Cargo Are Associated with Age-Related Oxidative Stress and Susceptibility to Cardiovascular Diseases: Exploratory Results from Microarray Data
Source: MDPI journal article supplement (doi:10.3390/biomedicines11112920), 2023-10-28
Supplement: s1 [file s1]

Supplementary Table S2.

| <b>Ingenuity Canonical Pathways</b>             | <b>-log(p-value)</b> | <b>p-value</b> | <b>z-score</b> |
|-------------------------------------------------|----------------------|----------------|----------------|
| Cardiac Hypertrophy Signaling                   | 12.6                 | 2.51E-13       | 1.195          |
| CCR3 Signaling in Eosinophils                   | 11.2                 | 6.31E-12       | 1.183          |
| Colorectal Cancer Metastasis Signaling          | 10.7                 | 2E-11          | 2.425          |
| Cardiac Hypertrophy Signaling (Enhanced)        | 10.3                 | 5.01E-11       | 1.237          |
| Pulmonary Fibrosis Idiopathic Signaling Pathway | 10.3                 | 5.01E-11       | 3.637          |
| Opioid Signaling Pathway                        | 10.1                 | 7.94E-11       | -0.465         |
| Hepatic Fibrosis Signaling Pathway              | 10.1                 | 7.94E-11       | 2.44           |
| Senescence Pathway                              | 9.72                 | 1.91E-10       | -1             |
| Glioblastoma Multiforme Signaling               | 9.49                 | 3.24E-10       | 1.697          |
| MYC Mediated Apoptosis Signaling                | 9.31                 | 4.9E-10        | 1.732          |
| G-Protein Coupled Receptor Signaling            | 9.26                 | 5.5E-10        | 1.436          |
| CREB Signaling in Neurons                       | 9.1                  | 7.94E-10       | 2.629          |
| Epithelial Adherens Junction Signaling          | 8.98                 | 1.05E-09       | 0.927          |
| Glioma Signaling                                | 8.5                  | 3.16E-09       | 1.134          |
| Role of NFAT in Cardiac Hypertrophy             | 8.45                 | 3.55E-09       | 0.762          |
| Endocannabinoid Developing Neuron Pathway       | 8.45                 | 3.55E-09       | 0.949          |
| Neuroinflammation Signaling Pathway             | 8.33                 | 4.68E-09       | 1.565          |
| GNRH Signaling                                  | 8.32                 | 4.79E-09       | 0.566          |
| Endocannabinoid Cancer Inhibition Pathway       | 8.2                  | 6.31E-09       | -0.849         |
| ERBB Signaling                                  | 8.14                 | 7.24E-09       | 0.493          |
| PEDF Signaling                                  | 8.07                 | 8.51E-09       | 0.845          |
| IL-8 Signaling                                  | 7.92                 | 1.2E-08        | 2.252          |
| CLEAR Signaling Pathway                         | 7.88                 | 1.32E-08       | -2.182         |

|                                                                               |      |          |        |
|-------------------------------------------------------------------------------|------|----------|--------|
| Cholecystokinin/Gastrin-mediated Signaling                                    | 7.7  | 2E-08    | 0.156  |
| NGF Signaling                                                                 | 7.66 | 2.19E-08 | 0.617  |
| Ovarian Cancer Signaling                                                      | 7.26 | 5.5E-08  | 1      |
| Pancreatic Adenocarcinoma Signaling                                           | 7.12 | 7.59E-08 | 0.898  |
| Pulmonary Healing Signaling Pathway                                           | 7.01 | 9.77E-08 | 2.032  |
| Breast Cancer Regulation by Stathmin1                                         | 6.93 | 1.17E-07 | 1.781  |
| Tumor Microenvironment Pathway                                                | 6.86 | 1.38E-07 | 0.927  |
| CXCR4 Signaling                                                               | 6.85 | 1.41E-07 | 1.809  |
| FAK Signaling                                                                 | 6.85 | 1.41E-07 | 2.49   |
| p38 MAPK Signaling                                                            | 6.84 | 1.45E-07 | 0.48   |
| Acute Myeloid Leukemia Signaling                                              | 6.8  | 1.58E-07 | 0.365  |
| Endothelin-1 Signaling                                                        | 6.78 | 1.66E-07 | 1.069  |
| Factors Promoting Cardiogenesis in Vertebrates                                | 6.73 | 1.86E-07 | 2.263  |
| Oxytocin In Brain Signaling Pathway                                           | 6.6  | 2.51E-07 | 0.651  |
| PTEN Signaling                                                                | 6.52 | 3.02E-07 | -0.617 |
| Regulation Of The Epithelial Mesenchymal Transition By Growth Factors Pathway | 6.52 | 3.02E-07 | 0.272  |
| Thrombin Signaling                                                            | 6.48 | 3.31E-07 | 0.42   |
| Apoptosis Signaling                                                           | 6.44 | 3.63E-07 | 0.493  |
| Renal Cell Carcinoma Signaling                                                | 6.34 | 4.57E-07 | 0.626  |
| Oxytocin Signaling Pathway                                                    | 6.31 | 4.9E-07  | 0.798  |
| ERK/MAPK Signaling                                                            | 6.31 | 4.9E-07  | 1.483  |
| SAPK/JNK Signaling                                                            | 6.26 | 5.5E-07  | 1.333  |
| Non-Small Cell Lung Cancer Signaling                                          | 6.24 | 5.75E-07 | 1.043  |
| 14-3-3-mediated Signaling                                                     | 6.22 | 6.03E-07 | 0.667  |
| Gαq Signaling                                                                 | 6.16 | 6.92E-07 | 1.809  |
| CDK5 Signaling                                                                | 6.14 | 7.24E-07 | 0.667  |
| Role Of Osteoclasts In Rheumatoid Arthritis Signaling Pathway                 | 6.12 | 7.59E-07 | 2.621  |

|                                                                       |      |          |        |
|-----------------------------------------------------------------------|------|----------|--------|
| LPS-stimulated MAPK Signaling                                         | 6.08 | 8.32E-07 | 1.616  |
| Inhibition of Angiogenesis by TSP1                                    | 5.95 | 1.12E-06 | 1.807  |
| Production of Nitric Oxide and Reactive Oxygen Species in Macrophages | 5.92 | 1.2E-06  | 0.412  |
| Endometrial Cancer Signaling                                          | 5.92 | 1.2E-06  | 1.606  |
| Melanoma Signaling                                                    | 5.9  | 1.26E-06 | 0.655  |
| Renin-Angiotensin Signaling                                           | 5.89 | 1.29E-06 | 0.845  |
| STAT3 Pathway                                                         | 5.78 | 1.66E-06 | 1.808  |
| TGF- $\beta$ Signaling                                                | 5.75 | 1.78E-06 | 1.347  |
| Systemic Lupus Erythematosus In T Cell Signaling Pathway              | 5.72 | 1.91E-06 | 0.75   |
| G $\alpha$ i Signaling                                                | 5.58 | 2.63E-06 | 0.507  |
| B Cell Receptor Signaling                                             | 5.47 | 3.39E-06 | -0.412 |
| ERB2-ERBB3 Signaling                                                  | 5.43 | 3.72E-06 | 0.6    |
| Small Cell Lung Cancer Signaling                                      | 5.38 | 4.17E-06 | 0.471  |
| CDX Gastrointestinal Cancer Signaling Pathway                         | 5.38 | 4.17E-06 | 1.313  |
| Cell Cycle: G1/S Checkpoint Regulation                                | 5.37 | 4.27E-06 | -2.294 |
| HGF Signaling                                                         | 5.37 | 4.27E-06 | 1.298  |
| PDGF Signaling                                                        | 5.31 | 4.9E-06  | 1.616  |
| P2Y Purigenic Receptor Signaling Pathway                              | 5.27 | 5.37E-06 | 0.667  |
| Role of NANOG in Mammalian Embryonic Stem Cell Pluripotency           | 5.25 | 5.62E-06 | 0.655  |
| ID1 Signaling Pathway                                                 | 5.15 | 7.08E-06 | -0.263 |
| Mouse Embryonic Stem Cell Pluripotency                                | 5.14 | 7.24E-06 | 0.686  |
| Thyroid Cancer Signaling                                              | 5.14 | 7.24E-06 | 1.671  |
| T Cell Exhaustion Signaling Pathway                                   | 5.03 | 9.33E-06 | -0.174 |
| Reelin Signaling in Neurons                                           | 5    | 0.00001  | 0.617  |
| FLT3 Signaling in Hematopoietic Progenitor Cells                      | 4.98 | 1.05E-05 | 0.557  |
| p70S6K Signaling                                                      | 4.97 | 1.07E-05 | 0.649  |
| Fc Epsilon RI Signaling                                               | 4.93 | 1.17E-05 | 1.521  |

|                                                          |      |          |        |
|----------------------------------------------------------|------|----------|--------|
| Phagosome Formation                                      | 4.91 | 1.23E-05 | 2.959  |
| IL-3 Signaling                                           | 4.88 | 1.32E-05 | 1.134  |
| Endocannabinoid Neuronal Synapse Pathway                 | 4.86 | 1.38E-05 | -0.156 |
| IGF-1 Signaling                                          | 4.82 | 1.51E-05 | 0.928  |
| Integrin Signaling                                       | 4.81 | 1.55E-05 | 1.483  |
| Dopamine-DARPP32 Feedback in cAMP Signaling              | 4.78 | 1.66E-05 | -1.265 |
| Angiopoietin Signaling                                   | 4.78 | 1.66E-05 | -0.218 |
| Neurotrophin/TRK Signaling                               | 4.78 | 1.66E-05 | 0.408  |
| Macropinocytosis Signaling                               | 4.78 | 1.66E-05 | 2.236  |
| Chemokine Signaling                                      | 4.78 | 1.66E-05 | 2.502  |
| WNT/ $\beta$ -catenin Signaling                          | 4.7  | 2E-05    | 1.508  |
| MicroRNA Biogenesis Signaling Pathway                    | 4.65 | 2.24E-05 | 1.54   |
| BMP signaling pathway                                    | 4.62 | 2.4E-05  | 1.134  |
| Synaptogenesis Signaling Pathway                         | 4.61 | 2.45E-05 | -0.465 |
| Ceramide Signaling                                       | 4.61 | 2.45E-05 | 0.186  |
| Necroptosis Signaling Pathway                            | 4.56 | 2.75E-05 | 0.302  |
| Natural Killer Cell Signaling                            | 4.55 | 2.82E-05 | -0.849 |
| HMGB1 Signaling                                          | 4.55 | 2.82E-05 | 0.949  |
| Sphingosine-1-phosphate Signaling                        | 4.53 | 2.95E-05 | 0.174  |
| Systemic Lupus Erythematosus In B Cell Signaling Pathway | 4.5  | 3.16E-05 | -0.12  |
| G Beta Gamma Signaling                                   | 4.48 | 3.31E-05 | 0.973  |
| GM-CSF Signaling                                         | 4.44 | 3.63E-05 | 0.853  |
| AMPK Signaling                                           | 4.42 | 3.8E-05  | -0.309 |
| TEC Kinase Signaling                                     | 4.42 | 3.8E-05  | 0.686  |
| BEX2 Signaling Pathway                                   | 4.41 | 3.89E-05 | 0.192  |
| Semaphorin Neuronal Repulsive Signaling Pathway          | 4.39 | 4.07E-05 | -1.067 |
| FGF Signaling                                            | 4.39 | 4.07E-05 | 0.73   |

|                                                                   |      |          |        |
|-------------------------------------------------------------------|------|----------|--------|
| HIF1 $\alpha$ Signaling                                           | 4.37 | 4.27E-05 | 1.483  |
| Agrin Interactions at Neuromuscular Junction                      | 4.34 | 4.57E-05 | -0.426 |
| IL-7 Signaling Pathway                                            | 4.32 | 4.79E-05 | 0.218  |
| GDNF Family Ligand-Receptor Interactions                          | 4.3  | 5.01E-05 | 1.633  |
| UVA-Induced MAPK Signaling                                        | 4.29 | 5.13E-05 | 0.471  |
| VEGF Family Ligand-Receptor Interactions                          | 4.29 | 5.13E-05 | 1.347  |
| Cyclins and Cell Cycle Regulation                                 | 4.28 | 5.25E-05 | 0.853  |
| Actin Nucleation by ARP-WASP Complex                              | 4.28 | 5.25E-05 | 2.711  |
| PCP (Planar Cell Polarity) Pathway                                | 4.27 | 5.37E-05 | 2.132  |
| PI3K/AKT Signaling                                                | 4.2  | 6.31E-05 | 0.156  |
| IL-1 Signaling                                                    | 4.19 | 6.46E-05 | 0.243  |
| Protein Kinase A Signaling                                        | 4.14 | 7.24E-05 | 0.226  |
| PAK Signaling                                                     | 4.14 | 7.24E-05 | 0.898  |
| Synaptic Long Term Potentiation                                   | 4.11 | 7.76E-05 | -0.649 |
| Role of MAPK Signaling in Promoting the Pathogenesis of Influenza | 4.11 | 7.76E-05 | 1.567  |
| IL-13 Signaling Pathway                                           | 4.09 | 8.13E-05 | 0.354  |
| IL-17 Signaling                                                   | 4.06 | 8.71E-05 | -0.295 |
| PKC $\theta$ Signaling in T Lymphocytes                           | 4.03 | 9.33E-05 | 0.169  |
| mTOR Signaling                                                    | 4.01 | 9.77E-05 | 3.042  |
| Huntington's Disease Signaling                                    | 3.97 | 0.000107 | 0.457  |
| Insulin Secretion Signaling Pathway                               | 3.95 | 0.000112 | -1.069 |
| fMLP Signaling in Neutrophils                                     | 3.95 | 0.000112 | 1.616  |
| Bladder Cancer Signaling                                          | 3.94 | 0.000115 | 1.291  |
| Estrogen-mediated S-phase Entry                                   | 3.93 | 0.000117 | 1.941  |
| Cell Cycle Regulation by BTG Family Proteins                      | 3.92 | 0.00012  | 0.632  |
| Telomerase Signaling                                              | 3.91 | 0.000123 | 0.408  |
| GADD45 Signaling                                                  | 3.9  | 0.000126 | 0.426  |

|                                                                    |      |          |        |
|--------------------------------------------------------------------|------|----------|--------|
| HER-2 Signaling in Breast Cancer                                   | 3.9  | 0.000126 | 0.802  |
| Synaptic Long Term Depression                                      | 3.81 | 0.000155 | 0.866  |
| Acute Phase Response Signaling                                     | 3.8  | 0.000158 | -0.457 |
| EGF Signaling                                                      | 3.8  | 0.000158 | 1.091  |
| Wound Healing Signaling Pathway                                    | 3.8  | 0.000158 | 1.408  |
| Melanocyte Development and Pigmentation Signaling                  | 3.79 | 0.000162 | 0.756  |
| Xenobiotic Metabolism General Signaling Pathway                    | 3.77 | 0.00017  | 1.093  |
| Autophagy                                                          | 3.74 | 0.000182 | -1.336 |
| ERK5 Signaling                                                     | 3.74 | 0.000182 | 0.408  |
| Paxillin Signaling                                                 | 3.73 | 0.000186 | 0.557  |
| IL-17A Signaling in Airway Cells                                   | 3.64 | 0.000229 | 0.853  |
| UVB-Induced MAPK Signaling                                         | 3.59 | 0.000257 | 1.606  |
| Signaling by Rho Family GTPases                                    | 3.56 | 0.000275 | 0.566  |
| cAMP-mediated signaling                                            | 3.56 | 0.000275 | 0.674  |
| Role of MAPK Signaling in Inhibiting the Pathogenesis of Influenza | 3.53 | 0.000295 | 1.043  |
| Gα12/13 Signaling                                                  | 3.53 | 0.000295 | 1.151  |
| NF-κB Activation by Viruses                                        | 3.53 | 0.000295 | 1.4    |
| Glioma Invasiveness Signaling                                      | 3.53 | 0.000295 | 1.964  |
| Amyotrophic Lateral Sclerosis Signaling                            | 3.5  | 0.000316 | 0.2    |
| Cardiac β-adrenergic Signaling                                     | 3.48 | 0.000331 | 1.46   |
| Polyamine Regulation in Colon Cancer                               | 3.43 | 0.000372 | 0.655  |
| Estrogen Receptor Signaling                                        | 3.42 | 0.00038  | 0.113  |
| Induction of Apoptosis by HIV1                                     | 3.42 | 0.00038  | 1.279  |
| Sumoylation Pathway                                                | 3.41 | 0.000389 | 0.6    |
| 3-phosphoinositide Biosynthesis                                    | 3.39 | 0.000407 | 1.809  |
| α-Adrenergic Signaling                                             | 3.37 | 0.000427 | 1.807  |
| ILK Signaling                                                      | 3.34 | 0.000457 | 0.152  |

|                                                                      |      |          |        |
|----------------------------------------------------------------------|------|----------|--------|
| Neuregulin Signaling                                                 | 3.34 | 0.000457 | 0.557  |
| Corticotropin Releasing Hormone Signaling                            | 3.34 | 0.000457 | 0.822  |
| CNTF Signaling                                                       | 3.32 | 0.000479 | 0.688  |
| Ephrin B Signaling                                                   | 3.32 | 0.000479 | 1.213  |
| RHO GDI Signaling                                                    | 3.3  | 0.000501 | -1.265 |
| Apelin Muscle Signaling Pathway                                      | 3.23 | 0.000589 | -1.134 |
| Regulation of IL-2 Expression in Activated and Anergic T Lymphocytes | 3.21 | 0.000617 | -0.186 |
| Role Of Osteoblasts In Rheumatoid Arthritis Signaling Pathway        | 3.2  | 0.000631 | -2.889 |
| ERBB4 Signaling                                                      | 3.2  | 0.000631 | 0.447  |
| RANK Signaling in Osteoclasts                                        | 3.19 | 0.000646 | 0.756  |
| Superpathway of Inositol Phosphate Compounds                         | 3.15 | 0.000708 | 1      |
| Amyloid Processing                                                   | 3.1  | 0.000794 | -0.333 |
| Insulin Receptor Signaling                                           | 3.1  | 0.000794 | 0.822  |
| Adrenomedullin signaling pathway                                     | 3.05 | 0.000891 | -0.146 |
| CCR5 Signaling in Macrophages                                        | 3.02 | 0.000955 | 1.732  |
| D-myo-inositol (1,4,5,6)-Tetrakisphosphate Biosynthesis              | 3.02 | 0.000955 | 1.808  |
| D-myo-inositol (3,4,5,6)-tetrakisphosphate Biosynthesis              | 3.02 | 0.000955 | 1.808  |
| UVC-Induced MAPK Signaling                                           | 2.98 | 0.001047 | 2.183  |
| VEGF Signaling                                                       | 2.97 | 0.001072 | 0.784  |
| Actin Cytoskeleton Signaling                                         | 2.95 | 0.001122 | 1.043  |
| HOTAIR Regulatory Pathway                                            | 2.95 | 0.001122 | 1.406  |
| Role of NFAT in Regulation of the Immune Response                    | 2.94 | 0.001148 | -0.632 |
| Sperm Motility                                                       | 2.93 | 0.001175 | 0.784  |
| Gas Signaling                                                        | 2.93 | 0.001175 | 0.816  |
| D-myo-inositol-5-phosphate Metabolism                                | 2.91 | 0.00123  | 1.265  |
| Role of p14/p19ARF in Tumor Suppression                              | 2.9  | 0.001259 | -0.302 |
| IL-15 Signaling                                                      | 2.87 | 0.001349 | 0.6    |

|                                                                                 |      |          |        |
|---------------------------------------------------------------------------------|------|----------|--------|
| PI3K Signaling in B Lymphocytes                                                 | 2.84 | 0.001445 | -1.029 |
| Prolactin Signaling                                                             | 2.83 | 0.001479 | 0.853  |
| Erythropoietin Signaling Pathway                                                | 2.83 | 0.001479 | 1.809  |
| RAC Signaling                                                                   | 2.81 | 0.001549 | 1.219  |
| Glutamate Receptor Signaling                                                    | 2.79 | 0.001622 | -0.447 |
| Pyridoxal 5'-phosphate Salvage Pathway                                          | 2.79 | 0.001622 | -0.229 |
| CD27 Signaling in Lymphocytes                                                   | 2.76 | 0.001738 | -0.229 |
| Death Receptor Signaling                                                        | 2.75 | 0.001778 | 0.962  |
| Coronavirus Pathogenesis Pathway                                                | 2.73 | 0.001862 | 1.043  |
| Leptin Signaling in Obesity                                                     | 2.65 | 0.002239 | 0.577  |
| GPCR-Mediated Nutrient Sensing in Enteroendocrine Cells                         | 2.63 | 0.002344 | -0.365 |
| DNA Methylation and Transcriptional Repression Signaling                        | 2.63 | 0.002344 | 0.626  |
| GPCR-Mediated Integration of Enteroendocrine Signaling Exemplified by an L Cell | 2.62 | 0.002399 | 1.606  |
| Th2 Pathway                                                                     | 2.6  | 0.002512 | 1.414  |
| Thrombopoietin Signaling                                                        | 2.58 | 0.00263  | 1.147  |
| Apelin Adipocyte Signaling Pathway                                              | 2.57 | 0.002692 | -1.043 |
| MSP-RON Signaling In Cancer Cells Pathway                                       | 2.53 | 0.002951 | 0.333  |
| Melatonin Signaling                                                             | 2.51 | 0.00309  | -0.218 |
| NF-κB Signaling                                                                 | 2.51 | 0.00309  | 0.762  |
| Pathogen Induced Cytokine Storm Signaling Pathway                               | 2.48 | 0.003311 | 1.434  |
| ICOS-ICOSL Signaling in T Helper Cells                                          | 2.46 | 0.003467 | -0.962 |
| RHOA Signaling                                                                  | 2.44 | 0.003631 | 1.257  |
| PD-1, PD-L1 cancer immunotherapy pathway                                        | 2.42 | 0.003802 | -0.853 |
| Phospholipase C Signaling                                                       | 2.41 | 0.00389  | 1.18   |
| VDR/RXR Activation                                                              | 2.4  | 0.003981 | 0.5    |
| Nitric Oxide Signaling in the Cardiovascular System                             | 2.4  | 0.003981 | 1.043  |
| CTLA4 Signaling in Cytotoxic T Lymphocytes                                      | 2.39 | 0.004074 | -0.59  |



|                                                                              |      |          |        |
|------------------------------------------------------------------------------|------|----------|--------|
| Type I Diabetes Mellitus Signaling                                           | 2.39 | 0.004074 | 0.408  |
| 3-phosphoinositide Degradation                                               | 2.39 | 0.004074 | 1.808  |
| FcγRIIB Signaling in B Lymphocytes                                           | 2.36 | 0.004365 | 0.775  |
| Estrogen-Dependent Breast Cancer Signaling                                   | 2.33 | 0.004677 | 0.894  |
| Role of Hypercytokinemia/hyperchemokineemia in the Pathogenesis of Influenza | 2.32 | 0.004786 | -0.894 |
| PPARα/RXRα Activation                                                        | 2.25 | 0.005623 | -0.649 |
| Aryl Hydrocarbon Receptor Signaling                                          | 2.22 | 0.006026 | 0.186  |
| Regulation of Actin-based Motility by Rho                                    | 2.2  | 0.00631  | 1.4    |
| Neuropathic Pain Signaling In Dorsal Horn Neurons                            | 2.19 | 0.006457 | -0.577 |
| SPINK1 General Cancer Pathway                                                | 2.16 | 0.006918 | 0.5    |
| Role Of Chondrocytes In Rheumatoid Arthritis Signaling Pathway               | 2.15 | 0.007079 | -0.507 |
| Neurovascular Coupling Signaling Pathway                                     | 2.14 | 0.007244 | 0.566  |
| Cell Cycle: G2/M DNA Damage Checkpoint Regulation                            | 2.13 | 0.007413 | 1.604  |
| Role of WNT/GSK-3β Signaling in the Pathogenesis of Influenza                | 2.13 | 0.007413 | 1.897  |
| PFKFB4 Signaling Pathway                                                     | 2.12 | 0.007586 | -1.604 |
| Relaxin Signaling                                                            | 2.12 | 0.007586 | 1.279  |
| Basal Cell Carcinoma Signaling                                               | 2.08 | 0.008318 | 0.832  |
| Osteoarthritis Pathway                                                       | 2.02 | 0.00955  | 1.043  |
| Regulation of eIF4 and p70S6K Signaling                                      | 2.01 | 0.009772 | 0.655  |
| Tumoricidal Function of Hepatic Natural Killer Cells                         | 1.99 | 0.010233 | 0.378  |
| MSP-RON Signaling In Macrophages Pathway                                     | 1.99 | 0.010233 | 0.378  |
| Role of Pattern Recognition Receptors in Recognition of Bacteria and Viruses | 1.95 | 0.01122  | -0.426 |
| Netrin Signaling                                                             | 1.93 | 0.011749 | -1.342 |
| CD28 Signaling in T Helper Cells                                             | 1.91 | 0.012303 | 0.756  |
| Toll-like Receptor Signaling                                                 | 1.9  | 0.012589 | -1.291 |
| Antiproliferative Role of Somatostatin Receptor 2                            | 1.9  | 0.012589 | 1.291  |
| PPAR Signaling                                                               | 1.89 | 0.012882 | 0.784  |

|                                                                 |      |          |        |
|-----------------------------------------------------------------|------|----------|--------|
| IL-22 Signaling                                                 | 1.86 | 0.013804 | 0.333  |
| nNOS Signaling in Neurons                                       | 1.82 | 0.015136 | -0.378 |
| ATM Signaling                                                   | 1.81 | 0.015488 | 1.279  |
| Oncostatin M Signaling                                          | 1.79 | 0.016218 | -0.577 |
| 4-1BB Signaling in T Lymphocytes                                | 1.75 | 0.017783 | 0.905  |
| Apelin Liver Signaling Pathway                                  | 1.74 | 0.018197 | 1.667  |
| Role of CHK Proteins in Cell Cycle Checkpoint Control           | 1.72 | 0.019055 | 0.277  |
| Dendritic Cell Maturation                                       | 1.71 | 0.019498 | -0.973 |
| T Cell Receptor Signaling                                       | 1.71 | 0.019498 | 0.149  |
| Fcγ Receptor-mediated Phagocytosis in Macrophages and Monocytes | 1.71 | 0.019498 | 1.225  |
| Antioxidant Action of Vitamin C                                 | 1.69 | 0.020417 | -0.218 |
| Type II Diabetes Mellitus Signaling                             | 1.68 | 0.020893 | 0.408  |
| Androgen Signaling                                              | 1.67 | 0.02138  | 0.688  |
| GP6 Signaling Pathway                                           | 1.66 | 0.021878 | 3.157  |
| Antiproliferative Role of TOB in T Cell Signaling               | 1.65 | 0.022387 | -0.905 |
| SNARE Signaling Pathway                                         | 1.65 | 0.022387 | 0.18   |
| White Adipose Tissue Browning Pathway                           | 1.56 | 0.027542 | 0.707  |
| Lymphotoxin β Receptor Signaling                                | 1.54 | 0.02884  | 0.535  |
| Pyroptosis Signaling Pathway                                    | 1.53 | 0.029512 | -0.655 |
| Growth Hormone Signaling                                        | 1.53 | 0.029512 | 1      |
| Apelin Cardiac Fibroblast Signaling Pathway                     | 1.5  | 0.031623 | -1.414 |
| MIF Regulation of Innate Immunity                               | 1.5  | 0.031623 | 0.577  |
| NRF2-mediated Oxidative Stress Response                         | 1.49 | 0.032359 | 0.898  |
| Regulation of Cellular Mechanics by Calpain Protease            | 1.47 | 0.033884 | -0.535 |
| Apelin Pancreas Signaling Pathway                               | 1.46 | 0.034674 | -0.832 |
| Dermatan Sulfate Biosynthesis                                   | 1.43 | 0.037154 | 0.535  |
| eNOS Signaling                                                  | 1.43 | 0.037154 | 1.3    |

|                                                              |      |          |        |
|--------------------------------------------------------------|------|----------|--------|
| Dermatan Sulfate Biosynthesis (Late Stages)                  | 1.39 | 0.040738 | 0.302  |
| Heparan Sulfate Biosynthesis                                 | 1.39 | 0.040738 | 0.688  |
| IL-17A Signaling in Gastric Cells                            | 1.39 | 0.040738 | 0.816  |
| Inhibition of ARE-Mediated mRNA Degradation Pathway          | 1.36 | 0.043652 | 0.354  |
| CD40 Signaling                                               | 1.31 | 0.048978 | 1      |
| Activation of IRF by Cytosolic Pattern Recognition Receptors | 1.3  | 0.050119 | -0.535 |
