# Supplementary material for: Circulating Total Extracellular Vesicles Cargo Are Associated with Age-Related Oxidative Stress and Susceptibility to Cardiovascular Diseases: Exploratory Results from Microarray Data
Source: MDPI journal article supplement (doi:10.3390/biomedicines11112920), 2023-10-28
Supplement: s1 [file s1]

**Supplementary Table S3.** Cardiac Hypertrophy Canonical Pathway

| miRNA         | Symbol  | Gene Name                                                              | p-value | Molecule Predicted Fold Change | Location        |
|---------------|---------|------------------------------------------------------------------------|---------|--------------------------------|-----------------|
| miR-92a-3p    | ADCY3   | adenylate cyclase 3                                                    | 0.00168 | 1.416                          | Plasma Membrane |
| miR-92a-3p    | ADRB1   | adrenoceptor beta 1                                                    | 0.00168 | 1.416                          | Plasma Membrane |
| miR-92a-3p    | GNAQ    | G protein subunit alpha q                                              | 0.00168 | 1.416                          | Plasma Membrane |
| miR-92a-3p    | HAND1   | heart and neural crest derivatives expressed 1                         | 0.00168 | 1.416                          | Nucleus         |
| miR-92a-3p    | HAND2   | heart and neural crest derivatives expressed 2                         | 0.00168 | 1.416                          | Nucleus         |
| miR-92a-3p    | MAP2K4  | mitogen-activated protein kinase kinase 4                              | 0.00168 | 1.416                          | Cytoplasm       |
| miR-92a-3p    | PIK3R3  | phosphoinositide-3-kinase regulatory subunit 3                         | 0.00168 | 1.416                          | Cytoplasm       |
| miR-92a-3p    | RAP1B   | RAP1B, member of RAS oncogene family                                   | 0.00168 | 1.416                          | Cytoplasm       |
| miR-31-3p     | PIK3CG  | phosphatidylinositol-4,5-bisphosphate 3-kinase catalytic subunit gamma | 0.0436  | 1.339                          | Cytoplasm       |
| miR-190a-5p   | CACNB2  | calcium voltage-gated channel auxiliary subunit beta 2                 | 0.0107  | 1.335                          | Plasma Membrane |
| miR-190a-5p   | GUCY1B1 | guanylate cyclase 1 soluble subunit beta 1                             | 0.0107  | 1.335                          | Cytoplasm       |
| miR-30c-1-3p  | CACNG7  | calcium voltage-gated channel auxiliary subunit gamma 7                | 0.0424  | 1.298                          | Plasma Membrane |
| miR-30c-1-3p  | CHP1    | calcineurin like EF-hand protein 1                                     | 0.0424  | 1.298                          | Cytoplasm       |
| miR-30c-1-3p  | MAPK13  | mitogen-activated protein kinase 13                                    | 0.0424  | 1.298                          | Cytoplasm       |
| miR-30c-1-3p  | PIK3R6  | phosphoinositide-3-kinase regulatory subunit 6                         | 0.0424  | 1.298                          | Cytoplasm       |
| miR-30c-1-3p  | RALB    | RAS like proto-oncogene B                                              | 0.0424  | 1.298                          | Cytoplasm       |
| miR-30c-1-3p  | RHOJ    | ras homolog family member J                                            | 0.0424  | 1.298                          | Cytoplasm       |
| miR-30c-1-3p  | ROCK1   | Rho associated coiled-coil containing protein kinase 1                 | 0.0424  | 1.298                          | Cytoplasm       |
| miR-30c-1-3p  | EIF4E   | eukaryotic translation initiation factor 4E                            | 0.0486  | 1.286                          | Cytoplasm       |
| miR-30c-1-3p  | GNB1    | G protein subunit beta 1                                               | 0.0486  | 1.286                          | Plasma Membrane |
| miR-30c-1-3p  | MAPK8   | mitogen-activated protein kinase 8                                     | 0.0486  | 1.286                          | Cytoplasm       |
| miR-30c-1-3p  | NRAS    | NRAS proto-oncogene, GTPase                                            | 0.0486  | 1.286                          | Plasma Membrane |
| miR-34a-5p    | ADRA1D  | adrenoceptor alpha 1D                                                  | 0.00859 | 1.276                          | Plasma Membrane |
| miR-34a-5p    | CACNB3  | calcium voltage-gated channel auxiliary subunit beta 3                 | 0.00859 | 1.276                          | Plasma Membrane |
| miR-34a-5p    | CACNG8  | calcium voltage-gated channel auxiliary subunit gamma 8                | 0.00859 | 1.276                          | Plasma Membrane |
| miR-34a-5p    | GNAO1   | G protein subunit alpha o1                                             | 0.00859 | 1.276                          | Plasma Membrane |
| miR-34a-5p    | GNAS    | GNAS complex locus                                                     | 0.00859 | 1.276                          | Plasma Membrane |
| miR-34a-5p    | MAP2K1  | mitogen-activated protein kinase kinase 1                              | 0.00859 | 1.276                          | Cytoplasm       |
| miR-34a-5p    | RRAS    | RAS related                                                            | 0.00859 | 1.276                          | Cytoplasm       |
| miR-22-3p     | GNAI3   | G protein subunit alpha i3                                             | 0.0351  | 1.272                          | Cytoplasm       |
| miR-22-3p     | MAPK14  | mitogen-activated protein kinase 14                                    | 0.0351  | 1.272                          | Cytoplasm       |
| miR-22-3p     | RHOV    | ras homolog family member V                                            | 0.0351  | 1.272                          | Plasma Membrane |
| miR-22-3p     | SRF     | serum response factor                                                  | 0.0351  | 1.272                          | Nucleus         |
| miR-3585-5p   | RHOA    | ras homolog family member A                                            | 0.00394 | 1.251                          | Cytoplasm       |
| miR-181a-1-3p | MAP3K5  | mitogen-activated protein kinase kinase kinase 5                       | 0.00689 | 1.241                          | Cytoplasm       |

|             |          |                                                                       |         |        |                     |
|-------------|----------|-----------------------------------------------------------------------|---------|--------|---------------------|
| miR-199a-3p | ADCY9    | adenylate cyclase 9                                                   | 0.00331 | 1.233  | Plasma Membrane     |
| miR-199a-3p | GNB2     | G protein subunit beta 2                                              | 0.00331 | 1.233  | Plasma Membrane     |
| miR-199a-3p | MAP3K11  | mitogen-activated protein kinase kinase kinase 11                     | 0.00331 | 1.233  | Cytoplasm           |
| miR-199a-3p | RAC1     | Rac family small GTPase 1                                             | 0.00331 | 1.233  | Plasma Membrane     |
| miR-199a-3p | ROCK2    | Rho associated coiled-coil containing protein kinase 2                | 0.00331 | 1.233  | Cytoplasm           |
| miR-199a-3p | TGFB2    | transforming growth factor beta 2                                     | 0.00331 | 1.233  | Extracellular Space |
| miR-199a-3p | TGFBR1   | transforming growth factor beta receptor 1                            | 0.00331 | 1.233  | Plasma Membrane     |
| let-7a-5p   | ADRB2    | adrenoceptor beta 2                                                   | 0.0378  | 1.16   | Plasma Membrane     |
| let-7a-5p   | ADRB3    | adrenoceptor beta 3                                                   | 0.0378  | 1.16   | Plasma Membrane     |
| let-7a-5p   | GNG5     | G protein subunit gamma 5                                             | 0.0378  | 1.16   | Plasma Membrane     |
| let-7a-5p   | IGF1R    | insulin like growth factor 1 receptor                                 | 0.0378  | 1.16   | Plasma Membrane     |
| let-7a-5p   | MAP3K13  | mitogen-activated protein kinase kinase kinase 13                     | 0.0378  | 1.16   | Cytoplasm           |
| let-7a-5p   | PRKAR2A  | protein kinase cAMP-dependent type II regulatory subunit alpha        | 0.0378  | 1.16   | Cytoplasm           |
| let-7a-5p   | RHOB     | ras homolog family member B                                           | 0.0378  | 1.16   | Cytoplasm           |
| let-7a-5p   | RHOG     | ras homolog family member G                                           | 0.0378  | 1.16   | Cytoplasm           |
| miR-410-5p  | CACNA2D1 | calcium voltage-gated channel auxiliary subunit alpha2delta 1         | 0.033   | -1.154 | Plasma Membrane     |
| miR-410-5p  | RHOBTB2  | Rho related BTB domain containing 2                                   | 0.033   | -1.154 | Cytoplasm           |
| miR-143-3p  | KRAS     | KRAS proto-oncogene, GTPase                                           | 0.0194  | -1.212 | Cytoplasm           |
| miR-143-3p  | MAPK12   | mitogen-activated protein kinase 12                                   | 0.0194  | -1.212 | Cytoplasm           |
| miR-142-3p  | GNA12    | G protein subunit alpha 12                                            | 0.0423  | -1.233 | Plasma Membrane     |
| miR-142-3p  | MAP3K4   | mitogen-activated protein kinase kinase kinase 4                      | 0.0423  | -1.233 | Cytoplasm           |
| miR-142-3p  | MTOR     | mechanistic target of rapamycin kinase                                | 0.0423  | -1.233 | Nucleus             |
| miR-142-3p  | PIK3CB   | phosphatidylinositol-4,5-bisphosphate 3-kinase catalytic subunit beta | 0.0423  | -1.233 | Cytoplasm           |
| miR-17-5p   | GUCY1A1  | guanylate cyclase 1 soluble subunit alpha 1                           | 0.0462  | -1.249 | Cytoplasm           |
| miR-17-5p   | MAP3K2   | mitogen-activated protein kinase kinase kinase 2                      | 0.0462  | -1.249 | Cytoplasm           |
| miR-17-5p   | MAP3K12  | mitogen-activated protein kinase kinase kinase 12                     | 0.0462  | -1.249 | Cytoplasm           |
| miR-17-5p   | MEF2D    | myocyte enhancer factor 2D                                            | 0.0462  | -1.249 | Nucleus             |
| miR-17-5p   | PPP3R1   | protein phosphatase 3 regulatory subunit B, alpha                     | 0.0462  | -1.249 | Cytoplasm           |
| miR-17-5p   | RHOC     | ras homolog family member C                                           | 0.0462  | -1.249 | Plasma Membrane     |
| miR-214-3p  | ADSS2    | adenylosuccinate synthase 2                                           | 0.0334  | -1.265 | Cytoplasm           |
| miR-214-3p  | ATF2     | activating transcription factor 2                                     | 0.0334  | -1.265 | Nucleus             |
| miR-214-3p  | MAP3K9   | mitogen-activated protein kinase kinase kinase 9                      | 0.0334  | -1.265 | Cytoplasm           |
| miR-296-3p  | CREB1    | cAMP responsive element binding protein 1                             | 0.0226  | -1.288 | Nucleus             |
| miR-296-3p  | PPP3R2   | protein phosphatase 3 regulatory subunit B, beta                      | 0.0226  | -1.288 | Cytoplasm           |
| miR-296-3p  | PRKAG1   | protein kinase AMP-activated non-catalytic subunit gamma 1            | 0.0226  | -1.288 | Nucleus             |
| miR-153-3p  | GRB2     | growth factor receptor bound protein 2                                | 0.0226  | -1.382 | Cytoplasm           |
| miR-153-3p  | PLCB1    | phospholipase C beta 1                                                | 0.0226  | -1.382 | Cytoplasm           |
| miR-153-3p  | PLCZ1    | phospholipase C zeta 1                                                | 0.0226  | -1.382 | Cytoplasm           |

|              |         |                                                         |        |        |                     |
|--------------|---------|---------------------------------------------------------|--------|--------|---------------------|
| miR-153-3p   | TGFB2   | transforming growth factor beta receptor 2              | 0.0226 | -1.382 | Plasma Membrane     |
| miR-150-3p   | GNG12   | G protein subunit gamma 12                              | 0.0297 | -1.401 | Plasma Membrane     |
| miR-150-3p   | RAP2B   | RAP2B, member of RAS oncogene family                    | 0.0297 | -1.401 | Plasma Membrane     |
| miR-128-1-5p | CACNA1A | calcium voltage-gated channel subunit alpha1 A          | 0.0468 | -1.906 | Plasma Membrane     |
| miR-128-1-5p | CACNG4  | calcium voltage-gated channel auxiliary subunit gamma 4 | 0.0468 | -1.906 | Plasma Membrane     |
| miR-128-1-5p | GNAI2   | G protein subunit alpha i2                              | 0.0468 | -1.906 | Plasma Membrane     |
| miR-128-1-5p | GNAZ    | G protein subunit alpha z                               | 0.0468 | -1.906 | Plasma Membrane     |
| miR-128-1-5p | GNG13   | G protein subunit gamma 13                              | 0.0468 | -1.906 | Plasma Membrane     |
| miR-128-1-5p | MAP2K3  | mitogen-activated protein kinase kinase 3               | 0.0468 | -1.906 | Cytoplasm           |
| miR-128-1-5p | MEF2B   | myocyte enhancer factor 2B                              | 0.0468 | -1.906 | Nucleus             |
| miR-128-1-5p | NKX2-5  | NK2 homeobox 5                                          | 0.0468 | -1.906 | Nucleus             |
| miR-128-1-5p | NOTUM   | notum, palmitoleoyl-protein carboxylesterase            | 0.0468 | -1.906 | Extracellular Space |
| miR-128-1-5p | PIK3R2  | phosphoinositide-3-kinase regulatory subunit 2          | 0.0468 | -1.906 | Cytoplasm           |
| miR-128-1-5p | PLCH2   | phospholipase C eta 2                                   | 0.0468 | -1.906 | Cytoplasm           |
| miR-128-1-5p | PRKACA  | protein kinase cAMP-activated catalytic subunit alpha   | 0.0468 | -1.906 | Cytoplasm           |
| miR-128-1-5p | RASD2   | RASD family member 2                                    | 0.0468 | -1.906 | Cytoplasm           |
| miR-128-1-5p | TGFB1   | transforming growth factor beta 1                       | 0.0468 | -1.906 | Extracellular Space |
