# Supplementary material for: Circulating Total Extracellular Vesicles Cargo Are Associated with Age-Related Oxidative Stress and Susceptibility to Cardiovascular Diseases: Exploratory Results from Microarray Data
Source: MDPI journal article supplement (doi:10.3390/biomedicines11112920), 2023-10-28
Supplement: s1 [file s1]

Supplementary Table S1

**The 48 differentially expressed microRNA between the aged and young-adult groups ( $p < 0.05$ ; fold change  $\geq |1.1|$ ) observed in Partek Analysis.**

| Probeset ID       | Fold-Change<br>(Aged vs. Young-Adult) | Fold-Change<br>(Aged vs. Young-Adult) |
|-------------------|---------------------------------------|---------------------------------------|
| rno-let-7c-5p     | -1.16028                              | Aged down vs Young-Adult              |
| rno-miR-106b-5p   | 1.24874                               | Aged up vs Young-Adult                |
| rno-miR-128-2-5p  | 1.90585                               | Aged up vs Young-Adult                |
| rno-miR-1298      | 1.16639                               | Aged up vs Young-Adult                |
| rno-miR-142-3p    | -1.23301                              | Aged down vs Young-Adult              |
| rno-miR-143-3p    | 1.21171                               | Aged up vs Young-Adult                |
| rno-miR-150-3p    | 1.40147                               | Aged up vs Young-Adult                |
| rno-miR-153-3p    | 1.38177                               | Aged up vs Young-Adult                |
| rno-miR-181a-1-3p | -1.2052                               | Aged down vs Young-Adult              |
| rno-miR-181c-3p   | -1.24133                              | Aged down vs Young-Adult              |
| rno-miR-190b-5p   | -1.33542                              | Aged down vs Young-Adult              |
| rno-miR-199a-3p   | 1.23322                               | Aged up vs Young-Adult                |
| rno-miR-214-5p    | -1.30019                              | Aged down vs Young-Adult              |
| rno-miR-218a-2-3p | 1.19794                               | Aged up vs Young-Adult                |
| rno-miR-22-3p     | -1.27173                              | Aged down vs Young-Adult              |
| rno-miR-25-3p     | -1.41609                              | Aged down vs Young-Adult              |
| rno-miR-296-3p    | 1.28763                               | Aged up vs Young-Adult                |
| rno-miR-3085      | 1.14837                               | Aged up vs Young-Adult                |
| rno-miR-30c-1-3p  | -1.29773                              | Aged down vs Young-Adult              |
| rno-miR-3102      | 1.28118                               | Aged up vs Young-Adult                |
| rno-miR-3120      | -1.28576                              | Aged down vs Young-Adult              |
| rno-miR-31a-3p    | -1.33894                              | Aged down vs Young-Adult              |
| rno-miR-31b       | -1.25732                              | Aged down vs Young-Adult              |
| rno-miR-320-5p    | -1.17829                              | Aged down vs Young-Adult              |
| rno-miR-34b-5p    | -1.26043                              | Aged down vs Young-Adult              |
| rno-miR-351-3p    | 1.54788                               | Aged up vs Young-Adult                |
| rno-miR-3559-5p   | -1.28751                              | Aged down vs Young-Adult              |
| rno-miR-3580-3p   | -1.35608                              | Aged down vs Young-Adult              |
| rno-miR-3580-5p   | -1.23411                              | Aged down vs Young-Adult              |
| rno-miR-3583-5p   | -1.25473                              | Aged down vs Young-Adult              |
| rno-miR-3585-5p   | -1.25096                              | Aged down vs Young-Adult              |
| rno-miR-3590-5p   | -1.2942                               | Aged down vs Young-Adult              |
| rno-miR-379-3p    | -1.24993                              | Aged down vs Young-Adult              |
| rno-miR-409b      | 1.20213                               | Aged up vs Young-Adult                |
| rno-miR-421-5p    | -1.17373                              | Aged down vs Young-Adult              |
| rno-miR-448-5p    | -1.29741                              | Aged down vs Young-Adult              |
| rno-miR-449a-5p   | -1.27571                              | Aged down vs Young-Adult              |

|                 |          |                          |
|-----------------|----------|--------------------------|
| rno-miR-451-3p  | -1.21042 | Aged down vs Young-Adult |
| rno-miR-488-3p  | -1.23306 | Aged down vs Young-Adult |
| rno-miR-496-5p  | 1.1538   | Aged up vs Young-Adult   |
| rno-miR-6330    | -1.3321  | Aged down vs Young-Adult |
| rno-miR-6332    | 1.31066  | Aged up vs Young-Adult   |
| rno-miR-673-5p  | -1.24319 | Aged down vs Young-Adult |
| rno-miR-743a-3p | -1.22295 | Aged down vs Young-Adult |
| rno-miR-761     | 1.26548  | Aged up vs Young-Adult   |
| rno-miR-878     | 1.21965  | Aged up vs Young-Adult   |
| rno-miR-881-5p  | -1.39481 | Aged down vs Young-Adult |
| rno-miR-92a-3p  | 1.19759  | Aged up vs Young-Adult   |
